# Supplementary material for: Effect of a Universal Postpartum Nurse Home Visiting Program on Child Maltreatment and Emergency Medical Care at 5 Years of Age: A Randomized Clinical Trial
Source: PubMed Central journal article supplement (PMC8264647; doi:10.1001/jamanetworkopen.2021.16024), 2021-07-07
Supplement: jamanetwopen-e2116024-s002.pdf [file jamanetwopen-e2116024-s002.pdf]

## Data Sharing Statement

Goodman. Effect of a Universal Postpartum Nurse Home Visiting Program on Child Maltreatment and Emergency Medical Care at 5 Years of Age. *JAMA Netw Open*. Published July 07, 2021.  
doi:10.1001/jamanetworkopen.2021.16024

### Data

**Data available:** Yes

**Data types:** Deidentified participant data, Other (please specify)

**Additional Information:** Codebooks

**How to access data:** Requests should be sent to  
[ben.goodman@duke.edu](mailto:ben.goodman@duke.edu)

**When available:** With publication

### Supporting Documents

**Document types:** None

### Additional Information

**Who can access the data:** Researchers with an IRB approval and approved proposal.

**Types of analyses:** Data will be made available for analyses proposed in the approved study proposal.

**Mechanisms of data availability:** Sensitive Box folder (approved by the Duke School of Medicine IRB for storage of HIPAA and ePHI data)

**Any additional restrictions:** None
